# Supplementary material
Source: PubMed Central journal article supplement (PMC2739042)

**Supplemental Figure 1.** The effect of 1-421 tau filaments is mediated by the activity of GSK-3. Axoplasms were perfused with filaments of 1-421 tau, and FAT rates ( $\mu\text{m}/\text{sec}$ ) monitored over a period of 50 min. (A) Perfusion of 1-421 filaments ( $2 \mu\text{M}$ ) specifically inhibited anterograde FAT in a time-dependent manner much as seen with filaments made from full-length tau ht40. (B) Co-perfusion of 1-421 filaments with phospho-CREB peptide ( $0.5 \text{ mM}$ ), a competitive inhibitor of GSK-3, blocked the effects of 1-421 filaments on FAT. These data indicate that the effects of 1-421 filaments on anterograde FAT are also mediated by activation of GSK-3. Graphs depict compiled data from at least three separate trials.

**Supplemental Figure 2.** Rendering of **5-ING-135** in complex with GSK-3 $\beta$ . This complex structure was generated from the available x-ray structure of the protein co-crystallized with staurosporine (PDB:1Q3D) with docking of the inhibitor performed using Molegro Virtual Docker program. ING-135 is a derivative of the natural product staurosporine that binds to the ATP-binding site of GSK-3, exhibiting an  $\text{IC}_{50}$  of  $7 \text{ nM}$ .

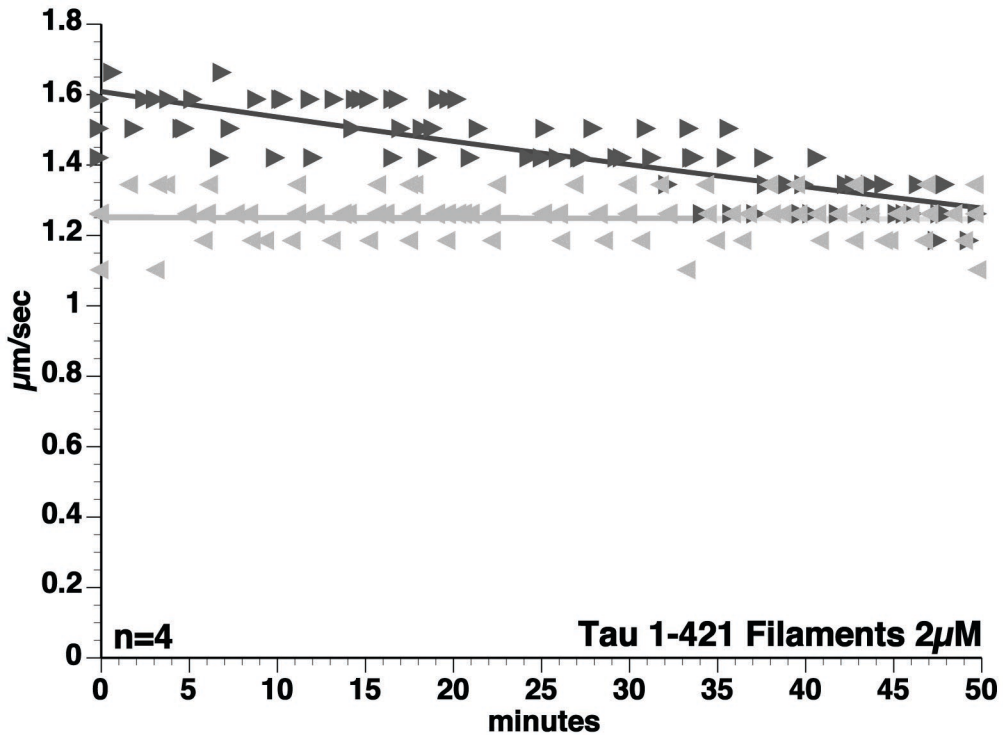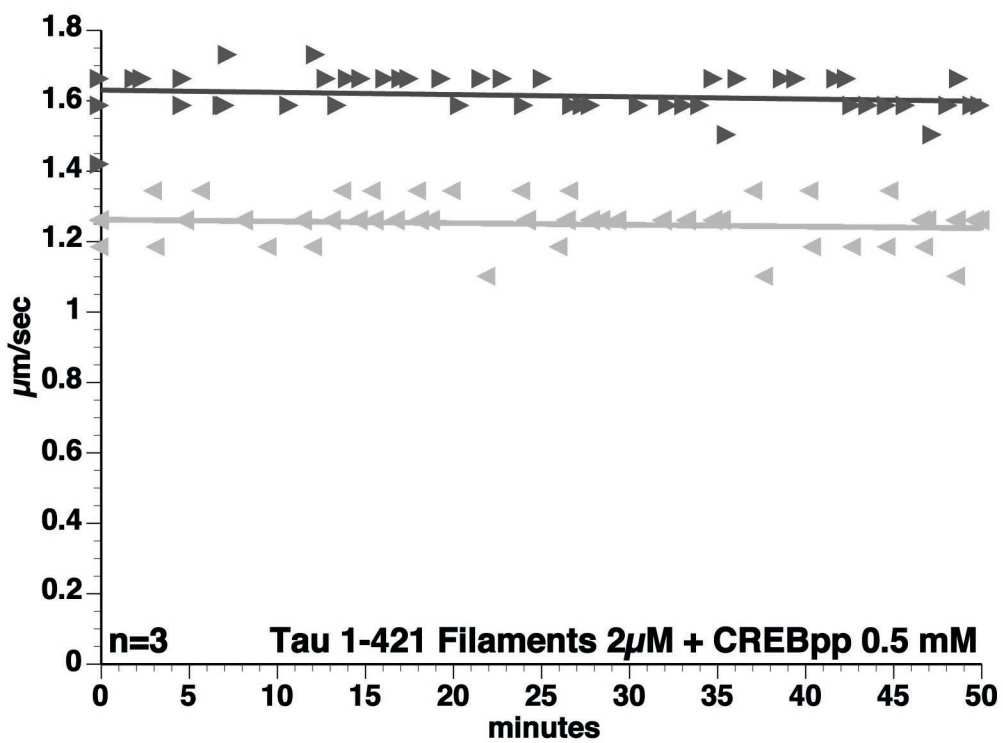

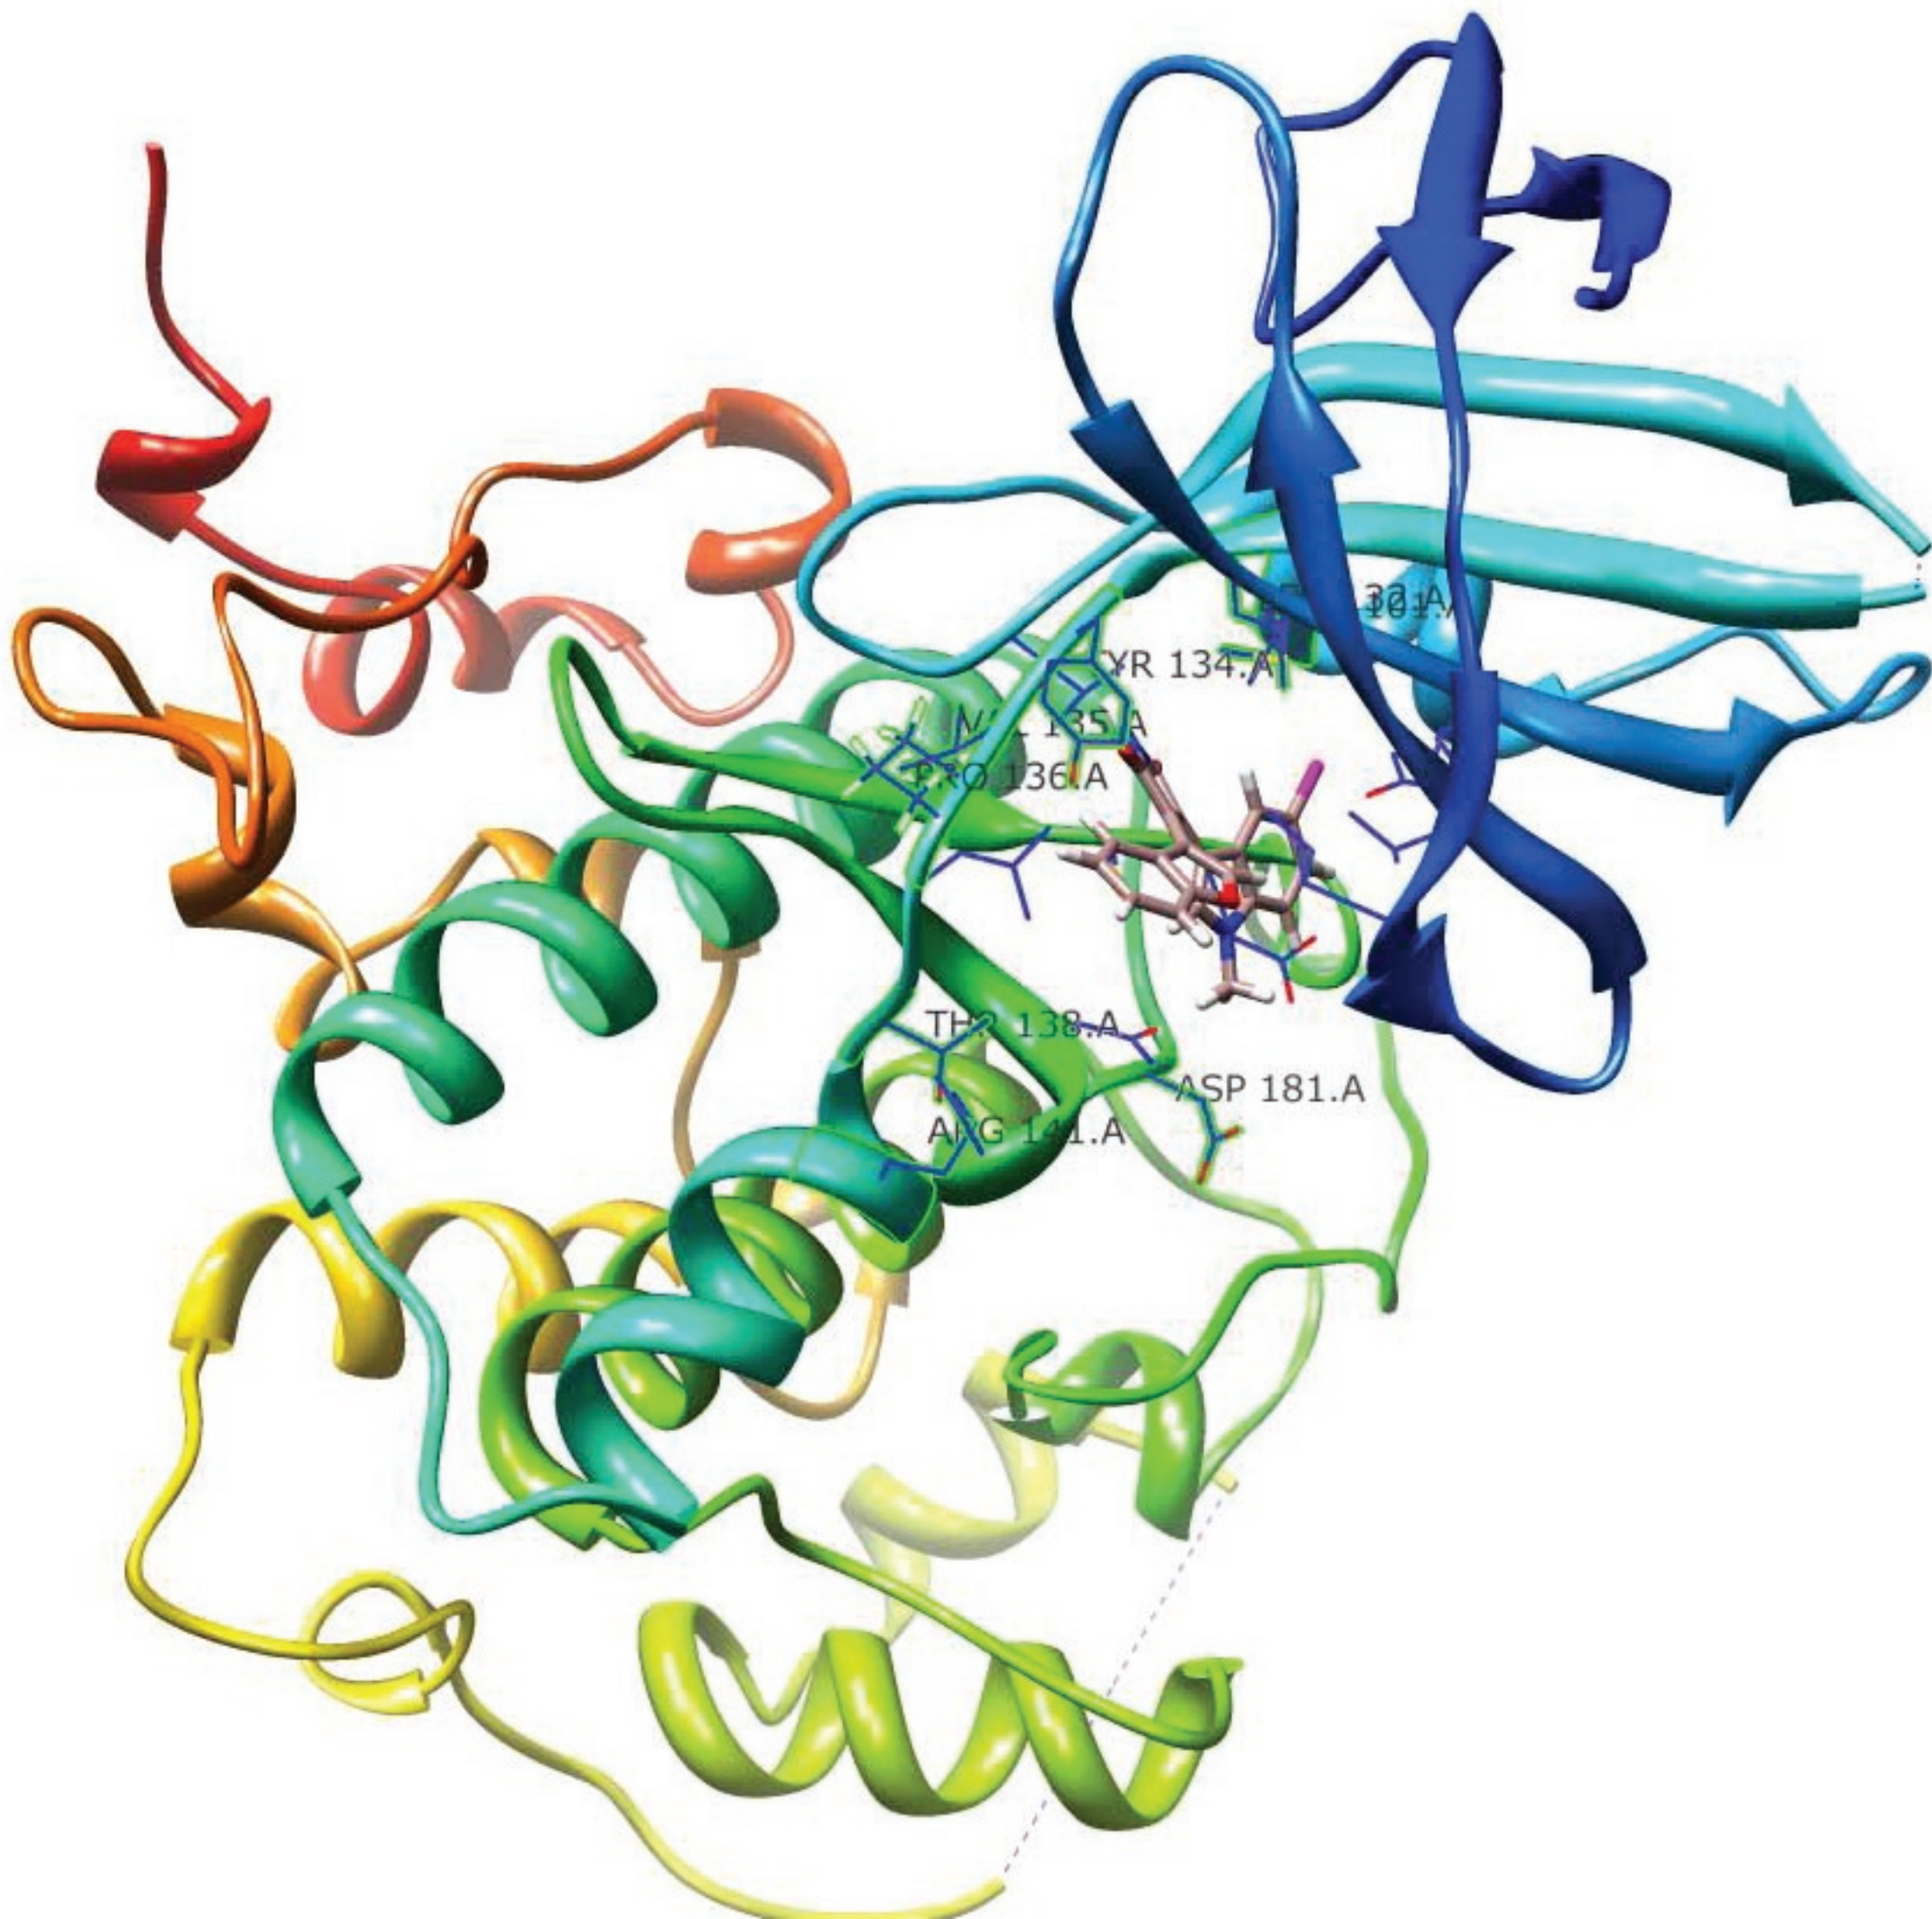

Supplement: NIHMS92933-supplement.pdf [file NIHMS92933-supplement.pdf]
